# Supplementary material for: Comparative physiological and metabolomics analysis reveals that single-walled carbon nanohorns and ZnO nanoparticles affect salt tolerance in Sophora alopecuroides
Source: Royal Society of Chemistry journal article supplement (doi:10.1039/d0en00582g), 2020-01-01
Supplement: d0en00582g2.xlsx [file d0en00582g2.xlsx]

## Sheet: leaf
Table S1. The significantly changed metabolites in the leaves of Sophora alopecuroides seedlings.
	log2 FC (SWCNH vs. control)	P-value			log2 FC (NaCl vs. control)	P-value			log2 FC (ZnO NP+NaCl vs. control)	P-value			log2 FC (SWCNH+NaCl vs. control)	P-value
glucose-6-phosphate	0.92992	0.0070524		mucic acid	7.0229	2.6967e-05		mucic acid	6.3355	3.769e-06		mucic acid	7.0359	0.0013547
D-glycerol 1-phosphate	0.79582	0.0056197		Saccharic acid	5.7589	1.1224e-06		Saccharic acid	6.06	7.7479e-08		guanine	5.3923	0.0037268
Gentiobiose	0.79569	0.018105		glutamine	3.9214	0.0050956		proline	4.0256	4.6856e-06		Saccharic acid	5.3468	2.4667e-06
3-Hydroxypyridine	0.67811	0.00050132		guanine	3.4541	0.0036386		ascorbate	3.9706	0.010468		raffinose	4.2798	0.0055246
Glutaric Acid	0.65947	0.0096573		proline	3.1799	0.00011919		glutamine 1	3.9395	0.0032734		glutamine	3.5138	0.011984
Dehydroascorbic Acid	0.65581	0.021907		cellobiose	3.0126	0.031302		conduritol b epoxide	3.7746	3.4701e-07		linolenic acid	3.4168	1.0725e-06
4-HYDROXYPYRIDINE	0.59949	0.00056745		raffinose	2.8269	0.00085487		raffinose	3.7344	2.5828e-06		linoleic acid	3.2838	2.9197e-07
4-aminobutyric acid	-0.63175	0.019417		Aconitic Acid	2.6723	0.00030612		Cellobiotol	3.6282	0.006925		conduritol b epoxide	3.0427	2.2829e-06
D-Glyceric acid	-0.77047	0.014694		malonic acid	2.3794	0.00081243		glucose-6-phosphate	3.2679	1.1582e-05		proline	2.7567	1.6814e-06
tyrosine	-0.84144	0.02834		glucose-6-phosphate	2.2379	0.00070003		Dehydroascorbic Acid	3.1029	5.096e-05		tryptophan	2.446	0.00099601
lysine	-1.3655	0.004981		glucuronic acid	1.8902	0.00051946		fructose-6-phosphate	3.0415	9.0338e-07		Aconitic Acid	2.4305	8.3673e-06
				Allantoic acid	1.799	0.0015956		Gentiobiose	2.8824	3.8641e-05		malonic acid	2.1303	0.016819
	log2 FC (ZnO NP vs. control)	P-value		linoleic acid	1.7441	0.00063221		Aconitic Acid	2.8542	3.4849e-05		lysine	1.9022	0.00015333
Dehydroascorbic Acid	0.71624	0.010769		tryptophan	1.7394	0.00056271		guanine	2.5853	0.005114		Allantoic acid	1.8189	0.00037036
malonic acid	0.59233	0.010387		D-Altrose	1.6329	0.0021821		arbutin	2.4461	0.0061636		Isoleucine	1.8072	5.0379e-05
N-Methyl-DL-alanine	-0.6461	0.0041834		alpha-ketoglutaric acid	1.6017	0.0020091		salicylic acid	2.348	0.011777		alpha-ketoglutaric acid	1.5392	0.02715
phenylalanine	-0.91731	0.0019936		Isoleucine	1.5932	0.0014483		L-cysteine	2.3358	0.00027056		stearic acid	1.5289	4.7022e-05
tryptophan	-1.0002	0.0051453		lysine	1.4495	0.021306		tryptophan	2.2402	2.1996e-05		glucuronic acid	1.5275	1.5812e-06
asparagine	-1.0376	0.019419		Galactonic acid	1.4354	0.00015111		D-Altrose	2.2107	3.0385e-06		D-Altrose	1.2944	6.2938e-05
				2-Deoxyerythritol	1.3751	0.0010194		glucuronic acid	2.2052	9.3773e-05		Purine riboside	1.278	0.0002553
	log2 FC (SWCNH+NaCl vs. NaCl)	P-value		stearic acid	1.2236	0.0089502		linoleic acid	2.1599	1.136e-06		guanosine	1.2189	0.018904
linolenic acid	2.2502	0.00022511		Diglycerol	1.1936	0.0069165		Galactonic acid	1.9968	2.9249e-05		2-Deoxyerythritol	1.1917	0.00034087
xylose	1.6497	0.036208		Maleamate	1.1822	0.049864		linolenic acid	1.9767	4.0074e-05		Galactonic acid	1.1305	3.8038e-05
linoleic acid	1.5462	0.0016108		linolenic acid	1.1727	0.004598		malonic acid	1.8409	0.0004313		lactose	1.1017	0.00081993
guanine	1.5412	0.011373		Purine riboside	1.1446	0.0055521		alpha-ketoglutaric acid	1.8388	0.00071106		Glucoheptonic acid	1.0817	0.0019142
Ethanolamine	1.1758	0.0053589		glycine	1.1445	0.021274		Lactobionic Acid	1.8348	0.0022284		palmitic acid	1.0567	0.0074418
raffinose	0.69128	0.049875		2-Deoxy-D-galactose	1.1323	0.0079432		asparagine	1.7541	0.001576		D-Talose	0.98719	0.0048008
glutamic acid	-1.2256	0.046265		tyrosine	1.0556	0.010128		lysine	1.7308	3.1891e-05		uridine	0.96988	0.016672
arbutin	-1.3099	0.01786		asparagine	1.0275	0.023672		Purine riboside	1.7232	1.4632e-05		glycine	0.95495	0.021015
				Glucoheptonic acid	0.97702	0.026245		guanosine	1.6336	4.991e-05		Gentiobiose	0.69792	0.019606
	log2 FC (ZnO NP+NaCl vs. NaCl)	P-value		Gentiobiose	0.96217	0.041564		stearic acid	1.6033	0.00026388		2-Deoxy-D-galactose	0.69036	0.0026047
Dehydroascorbic Acid	4.8112	0.0067816		galactose	0.88428	0.026543		2-Deoxy-D-galactose	1.5509	0.0028376		Diglycerol	0.67121	0.00038996
ascorbate	3.7948	0.021995		lactose	0.82134	0.01069		phenylalanine	1.5408	0.0022341		d-Glucoheptose	0.66817	0.0031423
Lactobionic Acid	2.1543	0.0018386		palmitic acid	0.80234	0.0058331		tyrosine	1.4994	0.00043177		galactose	0.63373	0.0069853
xylose	2.0989	0.0028761		d-Glucoheptose	0.70726	0.016905		Galactinol	1.4825	0.018137		1,5-Anhydroglucitol	-0.59671	0.0074155
Gentiobiose	1.9254	0.0013275		pantothenic acid	0.69446	0.0015324		Allantoic acid	1.4742	0.019172		alpha-D-glucosamine 1-phosphate	-0.664	0.0013485
arbutin	1.8649	0.0059165		sorbose	0.6657	0.021144		galactose	1.4328	0.00027638		glycerol	-0.6832	0.00047732
melibiose	1.692	0.00076999		palatinitol	-0.60358	0.043893		xylose	1.4308	0.00027183		Maleimide	-0.74862	0.012098
palatinitol	1.6278	0.0024345		melibiose	-0.68904	0.038342		D-galacturonic acid	1.3954	0.0018579		L-Malic acid	-0.85096	0.00034649
salicylic acid	1.6235	0.0010388		L-Malic acid	-0.72565	0.0035942		3-Hydroxypyridine	1.3922	2.8207e-06		Levoglucosan	-0.85347	0.021187
raffinose	1.621	8.8895e-05		benzoic acid	-0.84754	0.0092914		Isoleucine	1.3683	0.00031945		maleic acid	-0.89195	0.039603
4-Hydroxybenzoic acid	1.6192	0.01241		glycerol	-1.0342	0.0075272		Diglycerol	1.3653	0.0020655		Glucose-1-phosphate	-0.9115	0.019766
DL-dihydrosphingosine	1.609	0.0028428		benzyl alcohol	-1.1139	0.0013576		Glucoheptonic acid	1.3507	0.0038575		oxoproline	-0.99006	0.0038053
2-Monopalmitin	1.3812	0.013036		3-Cyanoalanine	-1.1613	0.032959		Lyxose	1.3367	0.00015062		benzoic acid	-1.0373	4.6152e-05
Ribonic acid, gamma-lactone	1.3731	0.014941		Ethanolamine	-1.2132	0.0016669		pantothenic acid	1.3347	5.9392e-05		D-glycerol 1-phosphate	-1.0629	0.0014963
guanosine	1.3453	0.0058083		sucrose	-1.2593	0.0042348		maleic acid	1.3139	0.0016217		shikimic acid	-1.1982	0.03236
maltose	1.2984	0.0090715		fumaric acid	-1.4708	0.0020843		Maleamate	1.2748	0.0002094		glutamic acid	-1.2684	0.02209
4-hydroxycinnamic acid	1.1827	0.015968		fructose	-1.6679	0.027088		N-Methyl-DL-alanine	1.2392	0.00029572		succinate semialdehyde	-1.3898	2.6515e-07
3-Hydroxypyridine	1.0994	0.0075596		succinate semialdehyde	-2.0155	0.00042681		DL-dihydrosphingosine	1.2307	0.00076144		sucrose	-1.3998	0.00034054
glucose-6-phosphate	1.037	0.013739		Erythrose	-2.4115	3.3762e-05		4-Hydroxybenzoic acid	1.2102	0.016397		fumaric acid	-1.5885	0.00011909
fumaric acid	0.92352	0.0481						sorbose	1.1723	0.00032795		3-Cyanoalanine	-1.7945	0.00017046
L-Malic acid	0.82594	0.0076853						Ribonic acid, gamma-lactone	1.0657	0.020951		Erythrose	-2.8914	0.00060591
linolenic acid	0.81695	0.027409						3-hydroxy-3-methylglutaric acid	1.038	0.015761		phytosphingosine	-4.1762	0.021676
4-HYDROXYPYRIDINE	0.81354	0.021417						D-Talose	1.0185	0.0032647
2-methylfumarate	0.80195	0.03286						beta-Mannosylglycerate	1.0022	0.00037282
succinic acid	0.74382	0.034077						palatinitol	0.99449	0.018134
Phenyl beta-D-glucopyranoside	0.7175	0.028419						melibiose	0.98326	0.0024953
beta-Mannosylglycerate	0.66907	0.032101						maltose	0.94029	0.0014903
pantothenic acid	0.65653	0.0072456						D-erythro-sphingosine	0.93679	0.011267
alpha-D-glucosamine 1-phosphate	0.62662	0.024268						glycine	0.90812	0.03413
2-Deoxyerythritol	-0.70969	0.039369						d-Glucoheptose	0.88696	0.0051319
1,5-Anhydroglucitol	-1.6011	0.035789						succinic acid	0.84106	0.0013542
								4-HYDROXYPYRIDINE	0.84015	0.00025729
								Digitoxose	0.82936	0.019003
								2-methylfumarate	0.77857	0.00021427
								4-hydroxycinnamic acid	0.74366	0.02165
								D-erythronolactone	0.73879	0.035294
								valine	0.70439	0.0011056
								N-Acetyl-beta-D-mannosamine	0.66877	0.035041
								2-Deoxyerythritol	0.65928	0.01155
								Itaconic acid	0.62323	0.039384
								3-Cyanoalanine	-0.63377	0.037617
								Pyruvic acid	-0.65959	0.0016803
								glycerol	-0.93306	0.0022239
								D-Glyceric acid	-1.025	0.0074591
								Ethanolamine	-1.6318	8.5727e-05
								succinate semialdehyde	-1.8467	6.3355e-07
								phytosphingosine	-2.2194	0.010147
								1,5-Anhydroglucitol	-2.4936	0.00012324
