# Supplementary material for: Comparative physiological and metabolomics analysis reveals that single-walled carbon nanohorns and ZnO nanoparticles affect salt tolerance in Sophora alopecuroides
Source: Royal Society of Chemistry journal article supplement (doi:10.1039/d0en00582g), 2020-01-01
Supplement: d0en00582g3.xlsx [file d0en00582g3.xlsx]

## Sheet: root
Table S2. The significantly changed metabolites in the roots of Sophora alopecuroides seedlings.
	log2 FC (SWCNH vs. control)	P-value			log2 FC (NaCl vs. control)	P-value			log2 FC (ZnO NP+NaCl vs. control)	P-value			log2 FC (SWCNH+NaCl vs. control)	P-value
tryptophan	1.1036	0.012365		Galactinol	4.3832	1.4583e-05		Galactinol	5.4139	6.5739e-06		Galactinol	3.9096	5.0373e-05
glucose-6-phosphate	1.0432	0.00034352		melibiose	4.2685	0.0087153		melibiose	4.4894	4.4068e-07		conduritol b epoxide	3.0412	1.0737e-05
4-hydroxybutyrate	0.99394	0.00020523		Leucrose	2.9317	0.00094807		conduritol b epoxide	3.4975	1.4374e-08		melibiose	2.7833	7.9029e-05
L-Malic acid	0.78055	0.0060425		conduritol b epoxide	2.8724	1.371e-06		Leucrose	2.8871	0.00050153		lysine	2.6174	8.8513e-05
Pyruvic acid	0.7069	0.00055292		raffinose	2.4016	2.1012e-05		raffinose	2.5582	1.2812e-06		Gentiobiose	2.5702	0.001674
Isoleucine	0.69859	0.0081167		5'-methylthioadenosine	1.969	0.0027017		5'-methylthioadenosine	2.5567	0.00078505		galactose	2.1623	0.0014731
ascorbate	0.67372	0.029564		myo-inositol	1.8159	3.2649e-06		myo-inositol	2.2944	4.1324e-07		5'-methylthioadenosine	1.9276	0.0088685
ribulose-5-phosphate	0.63946	0.0069361		alpha-ketoglutaric acid	1.4873	0.020921		alpha-ketoglutaric acid	2.2406	0.0023446		raffinose	1.8395	0.0024659
fructose-6-phosphate	0.5862	0.0002744		lysine	1.386	0.018297		proline	1.792	2.2925e-05		proline	1.6655	6.5432e-05
xylose	-0.63171	0.026997		ribose	1.2533	0.036343		Aconitic Acid	1.6654	0.00014171		myo-inositol	1.4924	0.00010266
glutamic acid	-0.63195	0.013408		proline	1.1653	2.4876e-05		malonic acid	1.6294	0.0044808		ribose	1.4612	0.034113
myo-inositol	-0.67943	0.00055384		alpha-D-glucosamine 1-phosphate	1.1217	0.010551		lactose	1.6125	0.00012033		Lyxose	1.3566	0.0068857
fructose	-0.84968	0.00014718		malonic acid	0.90775	0.037183		tryptophan	1.4955	0.0025741		tyrosine	1.2723	0.0021258
D-Glyceric acid	-0.85563	0.0059401		lactose	0.81793	0.03633		Dehydroascorbic Acid	1.4105	0.018946		uridine	1.247	0.036859
galactose	-0.95687	0.0013588		cellobiose	0.75638	0.018189		Lactobionic Acid	1.1957	0.023067		cellobiose	1.1842	0.0048736
lactic acid	-1.1051	0.00075817		galactose	0.65134	0.030446		24,25-dihydrolanosterol	1.0074	0.01479		D-glycerol 1-phosphate	1.1555	0.0057234
uridine	-1.4803	0.007478		valine	-0.65518	0.011512		3,6-Anhydro-D-galactose	1.0068	0.002349		alpha-ketoglutaric acid	1.0356	0.044464
melibiose	-2.1438	0.041193		aspartic acid	-0.66646	0.00076222		Phenyl beta-D-glucopyranoside	0.82686	0.001989		Gluconic lactone	1.0182	0.041576
				lactic acid	-0.74499	0.0014152		6-deoxy-D-glucose	0.82132	0.0013839		Dihydroxyacetone	0.88482	0.011854
	log2 FC (ZnO NP vs. control)	P-value		O-Phosphorylethanolamine	-0.79186	0.0042758		Levoglucosan	0.80362	0.046301		xylose	0.7992	0.048382
alpha-ketoglutaric acid	1.9504	0.010053		asparagine	-0.805	0.020737		Diglycerol	0.76029	0.0024336		4-hydroxybutyrate	0.74163	0.0065665
ribose	1.9252	0.02499		N-Acetyl-beta-D-mannosamine	-0.95753	0.02115		2-ketobutyric acid	0.71874	0.023862		glucose	0.73527	0.006619
4-hydroxybutyrate	1.7291	6.752e-05		Glucoheptonic acid	-0.99091	0.0045885		alpha-D-glucosamine 1-phosphate	0.68491	0.006574		4-hydroxypyridine	-0.61693	0.024052
Dihydroxyacetone	1.2374	0.00010322		arbutin	-1.0913	0.0066323		4-hydroxybutyrate	0.66768	0.0048033		3,6-Anhydro-D-galactose	-0.66854	0.040027
guanine	1.0758	0.036495		glutamic acid	-1.1795	0.00048723		3-Aminoisobutyric acid	0.59998	0.028779		serine	-0.68196	0.018364
Gentiobiose	0.98056	0.047122		Threonic acid	-1.2526	0.0096213		aspartic acid	-0.71015	0.0037511		O-Phosphorylethanolamine	-0.69019	0.0081724
uridine	0.95912	0.025243		ascorbate	-1.2645	0.049136		fructose	-0.73336	0.0005634		palmitic acid	-0.85248	0.0088276
3-Hydroxypropionic acid	0.89378	0.00014854		putrescine	-1.4799	0.00068718		phenylalanine	-0.78721	0.0038018		lactic acid	-0.90862	0.0061761
ascorbate	0.84374	0.0054779		fructose-6-phosphate	-1.5295	4.1061e-05		lactic acid	-0.80806	0.03573		valine	-0.92035	0.00057115
L-Malic acid	0.76795	0.0051112		L-Malic acid	-1.6132	0.00026457		serine	-0.86154	0.033346		Methyl Phosphate	-0.92671	0.0057413
L-homoserine	0.6256	0.019321		serine	-1.8028	0.00072588		L-Malic acid	-0.89265	0.0058408		fructose-6-phosphate	-0.98241	0.00065642
aspartic acid	-0.69334	0.00050866		glucose-6-phosphate	-2.2135	0.00023849		xylose	-0.91951	0.0013209		oxoproline	-1.0798	0.00051067
Allantoic acid	-0.71306	0.019433		L-Allothreonine	-2.223	0.0001026		putrescine	-1.3747	5.154e-05		Glucoheptonic acid	-1.1087	0.00045065
Threonic acid	-0.83317	0.011499		Linoleic acid methyl ester	-2.2717	0.00028911		arbutin	-1.5092	4.7947e-05		glutamic acid	-1.2114	0.0043514
asparagine	-1.0808	0.0017102		Tartronic acid	-2.8339	1.7047e-05		Ethanolamine	-1.586	1.6027e-05		fumaric acid	-1.2413	0.015089
tryptophan	-1.1335	0.02734		pantothenic acid	-2.8706	0.011283		asparagine	-1.641	0.0001734		arbutin	-1.2929	0.027848
lactose	-1.8631	0.0021033		fumaric acid	-3.1857	0.037596		glutamic acid	-1.6446	0.00013209		aspartic acid	-1.3081	0.00042511
L-Allothreonine	-1.9932	0.0010814		3-Cyanoalanine	-3.7653	3.4482e-05		L-Allothreonine	-1.7907	0.00022753		asparagine	-1.4999	0.00044998
3-Cyanoalanine	-2.3086	0.00078119		cycloleucine	-5.8626	2.3323e-05		D-Glyceric acid	-1.8122	0.0035985		L-Malic acid	-1.6447	0.00043381
melibiose	-2.4035	0.0083609						Linoleic acid methyl ester	-1.894	0.0047847		mucic acid	-1.6543	0.012465
cycloleucine	-2.6764	0.001087						uridine	-1.9452	0.0036923		N-Acetyl-beta-D-mannosamine	-1.735	5.2433e-05
								tyrosine	-2.0465	7.2977e-05		glucose-6-phosphate	-1.8482	2.0179e-05
	log2 FC (SWCNH+NaCl vs. NaCl)	P-value						fumaric acid	-2.3188	0.0062848		Erythrose	-1.8993	0.020206
cycloleucine	1.8768	0.032353						Tartronic acid	-2.8575	5.1996e-05		putrescine	-1.9299	0.0011996
galactose	1.5122	0.0092411						guanine	-3.5755	0.0072297		ribulose-5-phosphate	-2.0745	1.4026e-05
tyrosine	1.4978	0.01076						3-Cyanoalanine	-3.8694	3.7656e-06		Tartronic acid	-2.0869	0.00017929
lysine	1.2327	0.028964						cycloleucine	-3.9128	0.00067362		L-Allothreonine	-2.2585	0.00034012
serine	1.1217	0.014062										3-Cyanoalanine	-2.9596	0.00025933
D-Glyceric acid	0.96351	0.039537										cycloleucine	-3.9864	0.00016096
Dihydroxyacetone	0.64275	0.039423
palmitic acid	-0.61488	0.035293
oxoproline	-0.62647	0.015944
5-Aminovaleric acid	-0.63533	0.037538
aspartic acid	-0.64047	0.022102
3,6-Anhydro-D-galactose	-0.70893	0.035913
mucic acid	-1.3572	0.016128
Leucrose	-2.0139	0.00092101
	log2 FC (ZnO NP+NaCl vs. NaCl)	P-value
trehalose	2.2396	0.021371
glucose-6-phosphate	1.7364	0.00052915
tryptophan	1.5759	0.0024656
O-Phosphorylethanolamine	1.3037	0.00022599
Erythrose	1.1904	0.0054031
Aconitic Acid	1.1744	0.0044586
Galactinol	1.031	0.038589
citric acid	1.0244	0.0058391
Lactobionic Acid	1.012	0.0072572
3,6-Anhydro-D-galactose	0.96586	0.0033859
fructose-6-phosphate	0.9637	0.00046758
Pyruvic acid	0.93867	0.024399
Phenyl beta-D-glucopyranoside	0.92171	0.014659
mucic acid	0.89395	0.0056822
N-Acetyl-beta-D-mannosamine	0.88182	0.026891
beta-Alanine	0.84839	0.0002704
lactose	0.79498	0.041902
alpha-ketoglutaric acid	0.75371	0.019128
malonic acid	0.72214	0.0099945
L-Malic acid	0.72109	0.0025557
Methyl Phosphate	0.65438	0.0041493
proline	0.6271	0.002497
conduritol b epoxide 2	0.62561	0.0054546
4-HYDROXYPYRIDINE	0.61748	0.0064811
6-deoxy-D-glucose	0.60904	0.028742
5'-methylthioadenosine	0.58831	0.00027663
ribose	-0.73027	8.082e-05
phenylalanine	-0.79466	0.0057071
cellobiose	-0.80727	0.0051779
asparagine	-0.83555	0.04405
fructose	-0.8695	3.1601e-05
linoleic acid	-0.92819	7.2468e-06
galactose	-0.93035	0.0044799
xylose	-1.1376	1.7533e-07
Ethanolamine	-1.3357	0.00032084
tyrosine	-1.8217	0.0069336
uridine	-2.5903	0.00020449
guanine	-4.1234	0.002649
